# Supplementary material for: Design and Optimization of a Coal Substitution Path Based on Cost–Benefit Analysis: Evidence from Coal Resource-Based Cities in China
Source: MDPI journal article supplement (doi:10.3390/su152115448), 2023-10-30
Supplement: s1 [file s1]

# **Design and optimization of a coal substitution path based on cost–benefit analysis: evidence from coal resource-based cities in China**

Jia Wu<sup>a,b</sup>, Na Wu<sup>a</sup>, Qiang Feng<sup>a</sup>, Chenning Deng<sup>a</sup>, Xiaomin Zhang<sup>a</sup>, Zeqiang Fu<sup>a</sup>,

Zeqian Zhang<sup>a</sup>, Haisheng Li<sup>a,b</sup> \*

*a State Key Laboratory of Environmental Criteria and Risk Assessment, Chinese Research Academy of Environmental Sciences, Beijing 100012, China*

*b College of Water Sciences, Beijing Normal University, Beijing 100875, China*

## **Supplementary Information Contents**

### **Part 1. Accounting basis for coal substitution costs**

Table S1. Electricity and natural gas prices of civil sources in the study area.

Table S2. Electricity and natural gas prices of industrial boiler sources in the study area.

Table S3. Sales price of coal in the study area.

### **Part 2. Estimation of the emission reduction potential of air pollutants**

Table S4. Emission reduction potential under the optimal coal substitution path.

Table S5. Emission reduction potential of civil sources under the optimal coal substitution path.

---

\* Corresponding author.

*E-mail address:* lihs@craes.org.cn (H. Li).

## Part 1. Accounting basis for coal substitution costs

### 1. Accounting for the incremental costs of coal substitution

Tables S1 and S2 describe the calculation basis. To facilitate the calculation, the electricity price of civil sources was set to 0.23 CNY/kWh. It was obtained from the average distributed electric heating price and centralized electric heating flat load price. The electricity price of industrial boiler sources was set to 0.36 CNY/kWh according to the 35 – 110 kV flat load price of the Xinjiang power grid.

**Table S1.** Electricity and natural gas prices of civil sources in the study area.

| Electric heating price (CNY/kWh) |                         | Conversion factor from electricity to coal equivalent (10 <sup>4</sup> tce/10 <sup>8</sup> kWh) | Natural gas price (CNY/m <sup>3</sup> ) | Conversion factors from natural gas to coal equivalent (10 <sup>4</sup> tce/10 <sup>8</sup> m <sup>3</sup> ) |         |
|----------------------------------|-------------------------|-------------------------------------------------------------------------------------------------|-----------------------------------------|--------------------------------------------------------------------------------------------------------------|---------|
| Distributed                      | Centralized (Flat load) |                                                                                                 |                                         | Final consumption                                                                                            | Heating |
| 0.22                             | 0.24                    | 3.03                                                                                            | 1.34                                    | 12.02                                                                                                        | 12.19   |

**Table S2.** Electricity and gas prices of industrial boiler sources in the study area.

| Electricity price (CNY/kWh) | Conversion factor from electricity to coal equivalent (10 <sup>4</sup> tce/10 <sup>8</sup> kWh) | Natural gas price (CNY/m <sup>3</sup> ) | Conversion factor from natural gas to coal equivalent (10 <sup>4</sup> tce/10 <sup>8</sup> m <sup>3</sup> ) |
|-----------------------------|-------------------------------------------------------------------------------------------------|-----------------------------------------|-------------------------------------------------------------------------------------------------------------|
| 0.36                        | 3.03                                                                                            | 1.32                                    | 12.19                                                                                                       |

### 2. Accounting for the savings of coal substitution

Table S3 shows the calculation basis.

**Table S3.** Sales price of coal in the study area.

| Sales price (CNY/t) | Conversion factors from raw coal to coal equivalent (tce/t) |         |
|---------------------|-------------------------------------------------------------|---------|
|                     | Final consumption                                           | Heating |
| 350                 | 0.69                                                        | 0.65    |

## Part 2. Estimation of the emission reduction potential of air pollutants

**Table S4.** Emission reduction potential under the optimal coal substitution path.

| Emission situation of Air pollutants (t)        |      |                    |                                                    | Civil Sources    |              | Industrial boiler sources |                                                 | Total     | Emission reductions as a percentage of 2019 emission |
|-------------------------------------------------|------|--------------------|----------------------------------------------------|------------------|--------------|---------------------------|-------------------------------------------------|-----------|------------------------------------------------------|
|                                                 |      |                    |                                                    | Civil combustion | Civil boiler | Industrial boiler         | Industrial boilers with capacities under 65 t/h |           |                                                      |
| Air pollutant Emissions                         | 2019 | SO <sub>2</sub>    |                                                    | 3912.62          | 2053.09      | 5009.42                   | 3540.61                                         | 10975.13  | /                                                    |
|                                                 |      | NO <sub>x</sub>    |                                                    | 962.29           | 893.48       | 6105.27                   | 2918.05                                         | 7961.04   |                                                      |
|                                                 |      | CO                 |                                                    | 152274.82        | 3350.55      | 26484.59                  | 10942.69                                        | 182109.95 |                                                      |
|                                                 |      | VOCs               |                                                    | 634.48           | 482.48       | 3813.78                   | 1575.75                                         | 4930.74   |                                                      |
|                                                 |      | Particulate matter | PM <sub>10</sub>                                   | 9326.83          | 307.37       | 260.35                    | 128.56                                          | 9894.55   |                                                      |
|                                                 |      |                    | PM <sub>2.5</sub>                                  | 7254.20          | 107.58       | 91.12                     | 45.00                                           | 7452.91   |                                                      |
| Cumulative emission reductions of air pollutant | 2025 | SO <sub>2</sub>    |                                                    | 3912.62          | 2053.09      | 3540.61                   | 3540.61                                         | 9506.32   | 86.62%                                               |
|                                                 |      | NO <sub>x</sub>    | Emission reductions from coal reduction            | 962.29           | 893.48       | 2918.05                   | 2918.05                                         | /         | /                                                    |
|                                                 |      |                    | Emission increments from increased gas consumption | 59.12            | 11.62        | 357.78                    | 87.28                                           | /         | /                                                    |
|                                                 |      |                    | Total emission reductions                          | 903.17           | 881.85       | 2560.27                   | 2830.77                                         | 4345.30   | 54.58%                                               |
|                                                 |      | CO                 | Emission reductions from coal reduction            | 152274.82        | 3350.55      | 10942.69                  | 10942.69                                        | /         | /                                                    |

|  |             |                           |                                                    |                  |                |                 |                 |                  |               |
|--|-------------|---------------------------|----------------------------------------------------|------------------|----------------|-----------------|-----------------|------------------|---------------|
|  |             |                           | Emission increments from increased gas consumption | 78.96            | 15.53          | 333.81          | 81.43           | /                | /             |
|  |             |                           | <b>Total emission reductions</b>                   | <b>152195.86</b> | <b>3335.02</b> | <b>10608.88</b> | <b>10861.26</b> | <b>166139.76</b> | <b>91.23%</b> |
|  |             | <b>VOCs</b>               | Emission reductions from coal reduction            | 634.48           | 482.48         | 1575.75         | 1575.75         | /                | /             |
|  |             |                           | Emission increments from increased gas consumption | 0.00             | 0.00           | 30.81           | 7.52            | /                | /             |
|  |             |                           | <b>Total emission reductions</b>                   | <b>634.48</b>    | <b>482.48</b>  | <b>1544.93</b>  | <b>1568.23</b>  | <b>2661.89</b>   | <b>53.99%</b> |
|  |             | <b>Particulate matter</b> | <b>PM<sub>10</sub></b>                             | <b>9326.83</b>   | <b>307.37</b>  | <b>128.56</b>   | <b>128.56</b>   | <b>9762.77</b>   | <b>98.67%</b> |
|  |             |                           | <b>PM<sub>2.5</sub></b>                            | <b>7254.20</b>   | <b>107.58</b>  | <b>45.00</b>    | <b>45.00</b>    | <b>7406.78</b>   | <b>99.38%</b> |
|  | <b>2030</b> | <b>SO<sub>2</sub></b>     |                                                    | <b>3912.62</b>   | <b>2053.09</b> | <b>3540.61</b>  | <b>3540.61</b>  | <b>9506.32</b>   | <b>86.62%</b> |
|  |             | <b>NO<sub>x</sub></b>     | Emission reductions from coal reduction            | 962.29           | 893.48         | 2918.05         | 2918.05         | /                | /             |
|  |             |                           | Emission increments from increased gas consumption | 59.12            | 11.62          | 1380.21         | 115.22          | /                | /             |
|  |             |                           | <b>Total emission reductions</b>                   | <b>903.17</b>    | <b>881.85</b>  | <b>1537.84</b>  | <b>2802.84</b>  | <b>3322.87</b>   | <b>41.74%</b> |
|  |             | <b>CO</b>                 | Emission reductions from coal reduction            | 152274.82        | 3350.55        | 10942.69        | 10942.69        | /                | /             |
|  |             |                           | Emission increments from                           | 78.96            | 15.53          | 1287.75         | 107.50          | /                | /             |

|  |  |                           |                                                    |                  |                |                |                 |                  |               |
|--|--|---------------------------|----------------------------------------------------|------------------|----------------|----------------|-----------------|------------------|---------------|
|  |  |                           | increased gas consumption                          |                  |                |                |                 |                  |               |
|  |  |                           | <b>Total emission reductions</b>                   | <b>152195.86</b> | <b>3335.02</b> | <b>9654.94</b> | <b>10835.19</b> | <b>165185.81</b> | <b>90.71%</b> |
|  |  | <b>VOCs</b>               | Emission reductions from coal reduction            | 634.48           | 482.48         | 1575.75        | 1575.75         | /                | /             |
|  |  |                           | Emission increments from increased gas consumption | 0.00             | 0.00           | 118.87         | 9.92            | /                | /             |
|  |  |                           | <b>Total emission reductions</b>                   | <b>634.48</b>    | <b>482.48</b>  | <b>1456.88</b> | <b>1565.82</b>  | <b>2573.84</b>   | <b>52.20%</b> |
|  |  | <b>Particulate matter</b> | <b>PM<sub>10</sub></b>                             | 9326.83          | 307.37         | 128.56         | 128.56          | 9762.77          | 98.67%        |
|  |  |                           | <b>PM<sub>2.5</sub></b>                            | 7254.20          | 107.58         | 45.00          | 45.00           | 7406.78          | 99.38%        |

**Table S5.** Emission reduction potential of civil sources under the optimal coal substitution path.

| District      | Emission sources | Emission base   |                 |          |        |                  |                   | Emission reductions |                 |          |        |                  |                   | Emission reduction ratio |                 |    |      |                  |                   |
|---------------|------------------|-----------------|-----------------|----------|--------|------------------|-------------------|---------------------|-----------------|----------|--------|------------------|-------------------|--------------------------|-----------------|----|------|------------------|-------------------|
|               |                  | SO <sub>2</sub> | NO <sub>x</sub> | CO       | VOCs   | PM <sub>10</sub> | PM <sub>2.5</sub> | SO <sub>2</sub>     | NO <sub>x</sub> | CO       | VOCs   | PM <sub>10</sub> | PM <sub>2.5</sub> | SO <sub>2</sub>          | NO <sub>x</sub> | CO | VOCs | PM <sub>10</sub> | PM <sub>2.5</sub> |
| Changeji City | Civil Combustion | 959.90          | 236.08          | 37358.21 | 155.66 | 2288.19          | 1779.70           | 959.90              | 221.58          | 37338.84 | 155.66 | 2288.19          | 1779.70           | /                        | /               | /  | /    | /                | /                 |
|               | Civil boiler     | 181.40          | 65.09           | 244.10   | 35.15  | 9.50             | 3.32              | 181.40              | 64.25           | 242.97   | 35.15  | 9.50             | 3.32              | /                        | /               | /  | /    | /                | /                 |
| Fukang        | Civil Combustion | 549.85          | 135.23          | 21399.55 | 89.16  | 1310.72          | 1019.45           | 549.85              | 126.93          | 21388.46 | 89.16  | 1310.72          | 1019.45           | /                        | /               | /  | /    | /                | /                 |
|               | Civil boiler     | 565.40          | 282.41          | 1059.02  | 152.50 | 137.95           | 48.28             | 565.40              | 278.73          | 1054.12  | 152.50 | 137.95           | 48.28             | /                        | /               | /  | /    | /                | /                 |
| Hutubi        | Civil Combustion | 375.83          | 92.43           | 14626.94 | 60.95  | 895.40           | 696.81            | 375.83              | 86.76           | 14619.36 | 60.95  | 895.90           | 696.81            | /                        | /               | /  | /    | /                | /                 |
|               | Civil boiler     | 405.85          | 159.16          | 596.84   | 85.94  | 47.75            | 16.71             | 405.85              | 157.09          | 594.07   | 85.94  | 47.75            | 16.71             | /                        | /               | /  | /    | /                | /                 |
| Jimsar        | Civil Combustion | 522.62          | 128.54          | 20339.71 | 84.75  | 1245.81          | 968.96            | 522.62              | 120.64          | 20329.17 | 84.75  | 1245.81          | 968.96            | /                        | /               | /  | /    | /                | /                 |
|               | Civil boiler     | 170.19          | 99.23           | 372.12   | 53.58  | 18.64            | 6.52              | 170.19              | 97.94           | 370.39   | 53.58  | 18.64            | 6.52              | /                        | /               | /  | /    | /                | /                 |
| Manasi        | Civil Combustion | 424.64          | 104.44          | 16526.59 | 68.86  | 1012.25          | 787.31            | 424.64              | 98.02           | 16518.02 | 68.86  | 1012.25          | 787.31            | /                        | /               | /  | /    | /                | /                 |
|               | Civil boiler     | 208.56          | 122.68          | 460.07   | 66.25  | 40.12            | 14.04             | 208.56              | 121.09          | 457.93   | 66.25  | 40.12            | 14.04             | /                        | /               | /  | /    | /                | /                 |
| Mulei         | Civil Combustion | 328.15          | 80.71           | 12771.07 | 53.21  | 782.23           | 608.40            | 328.15              | 75.75           | 12764.45 | 53.21  | 782.23           | 608.40            | /                        | /               | /  | /    | /                | /                 |
|               | Civil boiler     | 65.00           | 30.59           | 114.71   | 16.52  | 2.16             | 0.76              | 65.00               | 30.19           | 114.17   | 16.52  | 2.16             | 0.76              | /                        | /               | /  | /    | /                | /                 |
| Qitai         | Civil Combustion | 751.63          | 184.86          | 29252.74 | 121.89 | 1791.73          | 1393.57           | 751.63              | 173.50          | 29237.57 | 121.89 | 1791.73          | 1393.57           | /                        | /               | /  | /    | /                | /                 |
|               | Civil boiler     | 456.69          | 134.32          | 503.70   | 72.53  | 51.26            | 17.94             | 456.69              | 132.57          | 501.37   | 72.53  | 51.26            | 17.94             | /                        | /               | /  | /    | /                | /                 |

| District | Emission sources | Emission base   |                 |           |        |                  |                   | Emission reductions |                 |           |        |                  |                   | Emission reduction ratio |                 |       |        |                  |                   |
|----------|------------------|-----------------|-----------------|-----------|--------|------------------|-------------------|---------------------|-----------------|-----------|--------|------------------|-------------------|--------------------------|-----------------|-------|--------|------------------|-------------------|
|          |                  | SO <sub>2</sub> | NO <sub>x</sub> | CO        | VOCs   | PM <sub>10</sub> | PM <sub>2.5</sub> | SO <sub>2</sub>     | NO <sub>x</sub> | CO        | VOCs   | PM <sub>10</sub> | PM <sub>2.5</sub> | SO <sub>2</sub>          | NO <sub>x</sub> | CO    | VOCs   | PM <sub>10</sub> | PM <sub>2.5</sub> |
| Total    | Civil Combustion | 3912.62         | 962.29          | 152274.82 | 634.48 | 9326.83          | 7254.20           | 3912.62             | 903.17          | 152195.86 | 634.48 | 9326.83          | 7254.20           | 100.00                   | 93.86           | 99.95 | 100.00 | 100.00           | 100.00            |
|          | Civil boiler     | 2053.09         | 893.48          | 3350.55   | 482.48 | 307.37           | 107.58            | 2053.09             | 881.85          | 3335.02   | 482.48 | 307.37           | 107.58            | 100.00                   | 98.70           | 99.54 | 100.00 | 100.00           | 100.00            |
